# Supplementary material for: Translating caring competencies to remote working environments: a systematic review protocol
Source: PubMed Central journal article supplement — BMJ Open. 2021 May 19;11(5):e048459. doi: 10.1136/bmjopen-2020-048459 (PMC8137205; doi:10.1136/bmjopen-2020-048459), 2021-05-19
Supplement: bmjopen-2020-048459.draft_revisions.pdf [file bmjopen-2020-048459.draft_revisions.pdf]

# BMJ Open

BMJ Open is committed to open peer review. As part of this commitment we make the peer review history of every article we publish publicly available.

When an article is published we post the peer reviewers' comments and the authors' responses online. We also post the versions of the paper that were used during peer review. These are the versions that the peer review comments apply to.

The versions of the paper that follow are the versions that were submitted during the peer review process. They are not the versions of record or the final published versions. They should not be cited or distributed as the published version of this manuscript.

BMJ Open is an open access journal and the full, final, typeset and author-corrected version of record of the manuscript is available on our site with no access controls, subscription charges or pay-per-view fees (<http://bmjopen.bmj.com>).

If you have any questions on BMJ Open's open peer review process please email [info.bmjopen@bmj.com](mailto:info.bmjopen@bmj.com)

# BMJ Open

## Translating caring competencies to remote working environments: A systematic review protocol

|                               |                                                                                                                                                                                                                                                                                                                                                                                                                                |
|-------------------------------|--------------------------------------------------------------------------------------------------------------------------------------------------------------------------------------------------------------------------------------------------------------------------------------------------------------------------------------------------------------------------------------------------------------------------------|
| Journal:                      | <i>BMJ Open</i>                                                                                                                                                                                                                                                                                                                                                                                                                |
| Manuscript ID                 | bmjopen-2020-048459                                                                                                                                                                                                                                                                                                                                                                                                            |
| Article Type:                 | Protocol                                                                                                                                                                                                                                                                                                                                                                                                                       |
| Date Submitted by the Author: | 26-Dec-2020                                                                                                                                                                                                                                                                                                                                                                                                                    |
| Complete List of Authors:     | Nowell, Lorelli S; University of Calgary<br>Lorenzetti, Diane; University of Calgary, Department of Surgery;<br>University of Calgary, Department of Surgery<br>Jacobsen, Michele; Werklund School of Education<br>Lorenzetti, Liza; University of Calgary<br>Paolucci, Elizabeth Oddone; University of Calgary, Department of<br>Community Health Sciences; University of Calgary, Department of<br>Community Health Sciences |
| Keywords:                     | EDUCATION & TRAINING (see Medical Education & Training), MEDICAL<br>EDUCATION & TRAINING, Information technology < BIOTECHNOLOGY &<br>BIOINFORMATICS, Telemedicine < BIOTECHNOLOGY &<br>BIOINFORMATICS                                                                                                                                                                                                                         |
|                               |                                                                                                                                                                                                                                                                                                                                                                                                                                |

SCHOLARONE™  
Manuscripts

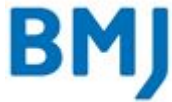

I, the Submitting Author has the right to grant and does grant on behalf of all authors of the Work (as defined in the below author licence), an exclusive licence and/or a non-exclusive licence for contributions from authors who are: i) UK Crown employees; ii) where BMJ has agreed a CC-BY licence shall apply, and/or iii) in accordance with the terms applicable for US Federal Government officers or employees acting as part of their official duties; on a worldwide, perpetual, irrevocable, royalty-free basis to BMJ Publishing Group Ltd ("BMJ") its licensees and where the relevant Journal is co-owned by BMJ to the co-owners of the Journal, to publish the Work in this journal and any other BMJ products and to exploit all rights, as set out in our [licence](#).

The Submitting Author accepts and understands that any supply made under these terms is made by BMJ to the Submitting Author unless you are acting as an employee on behalf of your employer or a postgraduate student of an affiliated institution which is paying any applicable article publishing charge ("APC") for Open Access articles. Where the Submitting Author wishes to make the Work available on an Open Access basis (and intends to pay the relevant APC), the terms of reuse of such Open Access shall be governed by a Creative Commons licence – details of these licences and which [Creative Commons](#) licence will apply to this Work are set out in our licence referred to above.

Other than as permitted in any relevant BMJ Author's Self Archiving Policies, I confirm this Work has not been accepted for publication elsewhere, is not being considered for publication elsewhere and does not duplicate material already published. I confirm all authors consent to publication of this Work and authorise the granting of this licence.

# Translating caring competencies to remote working environments: A systematic review protocol

Lorelli Nowell<sup>1</sup>, Diane L. Lorenzetti<sup>2,6</sup>, Michele Jacobsen<sup>3</sup>, Liza Lorenzetti<sup>4</sup>, Elizabeth Oddone  
Paolucci<sup>5,6</sup>

<sup>1</sup>Faculty of Nursing, University of Calgary, 2500 University Drive NW, Calgary, AB, CANADA T2N1N4, [lnowell@ucalgary.ca](mailto:lnowell@ucalgary.ca)

<sup>2</sup>Health Sciences Library, University of Calgary, 3330 Hospital Drive NW, Calgary, AB, T2N4N1, [dllorenz@ucalgary.ca](mailto:dllorenz@ucalgary.ca)

<sup>3</sup>Werklund School of Education, 2500 University Drive NW, Calgary, AB, CANADA T2N1N4, [dmjacobs@ucalgary.ca](mailto:dmjacobs@ucalgary.ca)

<sup>4</sup>Faculty of Social Work, University of Calgary, 2500 University Drive NW, Calgary, AB, CANADA T2N1N4, [lakloren@ucalgary.ca](mailto:lakloren@ucalgary.ca)

<sup>5</sup>Department of Community Health Sciences, Cumming School of Medicine, University of Calgary, 3280 Hospital Drive NW, Calgary, AB, CANADA T2N4Z6, [eoddone@ucalgary.ca](mailto:eoddone@ucalgary.ca)

<sup>6</sup>Department of Surgery, Cumming School of Medicine, University of Calgary, 3280 Hospital Drive NW, Calgary, AB, CANADA T2N4Z6, [eoddone@ucalgary.ca](mailto:eoddone@ucalgary.ca)

Correspondence should be addressed to Lorelli Nowell; [lnowell@ucalgary.ca](mailto:lnowell@ucalgary.ca)

**Word count:** 3623

## ABSTRACT

**Introduction:** Caring professions attend to the health, educational, and social needs of society rather than its material needs. Caring professionals are a vital part of the world's response to COVID-19, yet the global pandemic and its aftermath have significantly changed the ways in which care is provided. The rapid pivot to remote care, where the essential caring cues and opportunities are not as readily available, has put unprecedented pressure on caring professions. There is currently a lack of clear understanding and accepted standards for teaching caring profession students how to provide care remotely. The objective of this systematic review is to identify and assess the ways in which educators can integrate online learning opportunities to help students develop effective caring practices and translate these into today's remote and virtual care environments.

**Methods and analysis:** This systematic review will consider diverse quantitative, qualitative, and mixed-methods studies of innovative online education initiatives and required technology for caring profession education. Articles will be retrieved from academic databases and limited to articles reporting primary data and published in English within the last 10 years. Data extraction procedures will follow the Preferred Reporting Items for Systematic Reviews and Meta-Analyses reporting guideline. The methodological quality of all studies will be assessed using the Effective Public Health Practice Project Quality Assessment Tool (EPHPP) and/or the Joanna Briggs Institute Critical Appraisal Checklist for Qualitative Research. Study characteristics will be tabulated and narratively synthesized to integrate and explore relationships within the data.

**Ethics and dissemination:** No ethics approval is required to conduct this review. Review findings will be disseminated through peer-reviewed publications, conference presentations and be used to inform and guide caring profession education policy, practice, and research agendas

1  
2  
3 with the goal of improving education for caring profession students, and care for the patients,  
4  
5 clients and learners they serve.  
6  
7  
8  
9  
10  
11  
12  
13  
14  
15  
16  
17  
18  
19  
20  
21  
22  
23  
24  
25  
26  
27  
28  
29  
30  
31  
32  
33  
34  
35  
36  
37  
38  
39  
40  
41  
42  
43  
44  
45  
46  
47  
48  
49  
50  
51  
52  
53  
54  
55  
56  
57  
58  
59  
60

For peer review only

### STRENGTHS AND LIMITATIONS OF THIS STUDY

- This review will provide a systematic overview of the ways in which educators can integrate online learning opportunities to help students develop effective caring practices and translate them into today's remote and virtual care environments.
- Only English language articles published in the last 10 years will be included, therefore this review may overlook relevant contributions from other widely used languages or those published more than 10 years ago.
- This review will inform and guide caring professional education policy, practice, and research agendas with the goal of improving education for caring profession students and remote care for the patients, clients and learners they serve.

## INTRODUCTION

Caring professions, such as Education, Medicine, Nursing, Social Work, and Allied Health disciplines involve attending to health, well-being, and development, and encompass a humanitarian and human science orientation, and require human caring processes.<sup>1</sup> These professionals are employed to meet the health, educational, and social needs of society rather than its material needs<sup>2</sup> and are often in close, face-to-face contact with the recipients of their services.<sup>3</sup> Caring professionals deliver essential services that provide education, promote health and well-being, and support and advocate for individuals, families and communities in need – services at the heart of the world’s response to COVID-19.

The COVID-19 pandemic has shone a spotlight on the importance of access to digital tools in the workplace as caring professionals quickly pivoted to using technology to support their students, patients, and clients. Digital skills went from a "nice to have" to a “vital skill” as caring professionals were expected to seamlessly bridge technical competence with caring expertise. Caring work is almost always provided in the context of a relationship and therefore social and relational skills are required<sup>3</sup> as key components of discipline-specific skillsets. However, rapidly changing technological advancements have altered the skills and competencies required of the present and future work force.<sup>4,5</sup>

Caring professionals and higher education institutions are facing the challenges of learning to become proficient with technology for communication, connection, and collaboration. Though expert professionals may be able to more easily shift their focus from face-to-face to remote and virtual care, and back again, novice caring professionals may struggle with translating their caring or teaching skills to digital environments and resources, causing significant personal and professional repercussions.<sup>6,7</sup> When technology fails to help deliver the



1  
2  
3 expected care, both patients and care providers may experience anguish.<sup>7</sup> The growing use of  
4 open educational resources in higher education can address some equity and inclusion issues, but  
5 also raise new questions about representation, authorship, and perspective.<sup>8</sup> The onset of  
6 COVID-19 highlights the urgent need for caring professionals to develop the skills and  
7 competencies required to best meet the needs of the public they serve. Without these skills, the  
8 negative education, health, and social outcomes made more apparent by the pandemic, such as  
9 economic inequality, food security and inadequate access to health care<sup>9</sup> or schooling, may be  
10 exacerbated.

11  
12  
13  
14  
15  
16  
17  
18  
19  
20  
21  
22 Global attention has largely focused on risks to students going back to school, infected  
23 patients and the frontline responders, with some marginalised populations in society being  
24 overlooked.<sup>10</sup> Global efforts cannot ignore socio-economic, health and education equity, and it is  
25 imperative that digital technologies are used to ensure equal treatment and educational  
26 opportunities for all.<sup>11</sup> As specialized technologies are increasingly being developed and  
27 implemented to meet the needs of dynamic work environments, more time and resources are  
28 required to ensure that educators and students can efficiently use and master the technical aspects  
29 of their evolving roles.<sup>12</sup> Despite this pressing need, the literature lacks coherent, evidence-based  
30 direction about how educators can best integrate online learning opportunities to help students  
31 develop caring competencies and translate them to a digital working environment. This review  
32 will provide direction from across caring disciplines; specifically, those which are unified in  
33 requiring social skills to manage and maintain interpersonal relationships as central to their  
34 profession.

### 35 36 37 38 39 40 41 42 43 44 45 46 47 48 49 50 51 **Caring professional training and education**

1  
2  
3 Historically, caring professional education has been delivered using traditional face-to-  
4 face lecture, experiential and group in-class learning, and seminar formats. Education was often  
5 offered in tandem with work-integrated learning where students work with educators and  
6 practicing health professionals in placements to learn the hands-on skills, dispositions, and  
7 competencies required in the field (e.g., K-12 classrooms, hospital settings, counselling  
8 centers).<sup>5,13</sup> However, COVID -19 caused a sudden pivot to remote online teaching and learning  
9 contexts where caring professional training programs were required to implement alternative  
10 strategies to provide students with these valuable experiences and learning opportunities.<sup>14-16</sup>  
11 Rather than supplementing in-person instruction/experiences, online learning has become the  
12 mainstay, highlighting the need for professional programs to ensure the capacity of their students  
13 to operate confidently in online learning environments. While higher education has increased  
14 formal online learning opportunities for students over the last decade<sup>17</sup> educators often have  
15 limited awareness of and proficiency with technology required for today's workforce<sup>18</sup> and few  
16 have developed shared epistemic agency for leading these innovations.<sup>19</sup>  
17  
18  
19  
20  
21  
22  
23  
24  
25  
26  
27  
28  
29  
30  
31  
32  
33  
34  
35

36 Educators must enable caring profession students to become confident and effective users  
37 of technology. COVID-19 has demanded that teachers and students become comfortable in the  
38 use of various technologies to support teaching and learning. More broadly, the COVID-19  
39 pandemic has highlighted the need for educators to introduce students to technologies that have  
40 become crucial for providing essential care, communication, and learning connections. Educators  
41 are confronted with the dilemma of responding and adapting quickly to this increasingly critical  
42 emphasis on designing and supporting online educational environments. It is imperative to  
43 effectively support ongoing education and training to provide caring professionals with the  
44  
45  
46  
47  
48  
49  
50  
51  
52  
53  
54  
55  
56  
57  
58  
59  
60

1  
2  
3 required skills and competencies to ensure that they are able to persevere through the challenges  
4  
5 of the current pandemic and beyond.  
6  
7

## 8 **GOALS AND OBJECTIVES**

9

10 The objective of this mixed methods systematic review is to identify the ways in which  
11 innovative online education initiatives can best prepare graduates in caring professions for  
12 employment and competent and effective practice in the digital economy. We will identify  
13 knowledge strengths and gaps, including the applicability and/or transferability of strategies and  
14 practices to the wider band of interdisciplinary caring professional education contexts. The  
15 research questions that will guide this review are:  
16  
17  
18  
19  
20  
21  
22  
23

- 24 1. In what ways have digital technologies transformed the nature of professional education  
25 and prepared students to operate in emerging digital economies within the caring  
26 professions?  
27  
28
- 29 2. In what ways has COVID-19 driven innovation in caring professional education?  
30  
31
- 32 3. What educational strategies have proved to be most effective in preparing students to  
33 operate effectively in digital economies?  
34  
35  
36  
37

## 38 **METHODS AND ANALYSIS**

39

40 This protocol follows the Preferred Reporting Items for Systematic Reviews and Meta-  
41 Analysis Protocols (PRISMA-P) statement.<sup>20</sup> The mixed methods systematic review will follow  
42 the best practice outlines by the Centre for Reviews and Dissemination<sup>21</sup> by combining the  
43 findings of diverse primary studies within a single review.<sup>22,23</sup> This review will adhere to the  
44 Preferred Reporting Items for Systematic Reviews and Meta-Analysis Protocols (PRISMA)  
45 guidelines for the progress and reporting of systematic reviews.<sup>20,24</sup>  
46  
47  
48  
49  
50  
51  
52  
53

### 54 **Inclusion criteria**

55  
56  
57  
58  
59  
60

1  
2  
3 Studies will be included if they: (1) focus on the education of undergraduate and/or  
4 graduate students in the caring profession disciplines (Education, Medicine, Nursing, Social  
5 Work, and Allied Health); (2) describe current strategies to offer online learning designed to  
6 prepare students to operate in emerging digital economies; and (3) report on the impact of  
7 implementing these strategies including student and teacher perspectives, learning outcomes,  
8 capacity of students to develop career skills and competencies, and patient or learner  
9 perspectives.  
10  
11  
12  
13  
14  
15  
16  
17  
18

### 19 **Exclusion criteria**

20  
21 Studies will be excluded if they: (1) focus on the continuing education of professionals  
22 currently in practice; (2) are commentaries, editorials, letters or non-systematic reviews that do  
23 not report on outcomes or impact associated with online education; (3) have not been published  
24 within the last 10 years; and (4) are non-English language studies. We are limiting our inclusion  
25 to studies published within the last 10 years to capture the most recent and relevant online  
26 technologies, pedagogies, and practices.  
27  
28  
29  
30  
31  
32  
33  
34

### 35 **Search strategy**

36  
37 We will search the following multidisciplinary databases to identify English language  
38 journal articles suitable for inclusion in this review: CINAHL, Education Research Complete,  
39 EMBASE, ERIC, MEDLINE, Social Service Abstracts, Social Work Abstracts, and Scopus. The  
40 search strategy will incorporate database-specific subject headings (as appropriate) and keywords  
41 (title/abstract words) from three main concepts: (1) students currently registered in caring  
42 profession educations programs in academic institutions (allied health, education, medicine,  
43 nursing, social work); (2) pedagogical approaches or technologies to facilitate online learning;  
44 and (3) outcomes related to preparing students to work in emerging digital economies (e.g.,  
45  
46  
47  
48  
49  
50  
51  
52  
53  
54  
55  
56  
57  
58  
59  
60

1  
2  
3 learning outcomes and career skills development, as well student, teacher, and stakeholder  
4 perspectives). A preliminary search strategy for MEDLINE database was completed by the  
5  
6 team's health science librarian DLL, in consultation with the team (see online supplementary  
7  
8 file). This search strategy will be further developed and adapted for different databases. We will  
9  
10 also hand search the reference lists of all eligible studies to identify additional studies of  
11  
12 relevance to this review.  
13  
14  
15

### 16 **Study Selection**

17  
18  
19 All search results will be exported to Covidence to facilitate data management and the  
20  
21 organization and progress of this review. Studies will be screened in three stages. Prior to  
22  
23 screening, reviewers will independently screen a random sample of 50 abstracts using a  
24  
25 standardized screening tool in Excel to determine inter-rater reliability. Screening of the  
26  
27 remaining abstracts will commence when inter-rater agreement reaches 90%, at which point  
28  
29 titles and abstracts (Level 1) will be independently screened in duplicate by two reviewers.  
30  
31 Disagreements will be resolved by a third reviewer. Full texts of potential studies will be  
32  
33 obtained for Level 2 screening, which will be conducted in the same manner as Level 1  
34  
35 screening.  
36  
37  
38  
39

### 40 **Assessment of methodological quality and risk of bias**

41  
42 The methodological quality of quantitative studies will be assessed using the Effective  
43  
44 Public Health Practice Project Quality Assessment Tool (EPHPP),<sup>25</sup> which can be used to assess  
45  
46 multiple study designs and has evidence of validity and reliability. Each of six domains—  
47  
48 selection bias, study design, confounders, blinding, data collection methods, and withdrawals and  
49  
50 drop-outs—are rated as strong, moderate, weak, or not applicable. For qualitative studies, we  
51  
52 will use the Joanna Briggs Institute Critical Appraisal Checklist for Qualitative Research.<sup>26</sup> This  
53  
54  
55  
56  
57  
58  
59  
60

1  
2  
3 coherent tool performs well in assessing intrinsic methodological quality.<sup>27</sup> Ten domains are  
4 assessed as yes, no, unclear, or not applicable: philosophy, objective, data collection, data  
5 analysis, interpretation of results, theory or cultural location, researcher reflexivity, participant  
6 representation, ethical considerations, conclusion. For mixed methods studies, we will use both  
7 appraisal tools. These tools will enable us to identify higher quality evidence and practices  
8 among the literature. Two reviewers will independently assess the quality of all included studies.  
9 Disagreements will be resolved through discussion or adjudication by a third reviewer.

### 19 **Data extraction**

20  
21  
22 We will use a standardized Excel data extraction tool, which will be pilot tested by the  
23 reviewers using a random sample of five studies. Following the pilot test, one reviewer will  
24 extract study data; a second reviewer will verify the extracted data for accuracy. The following  
25 data items will be extracted: study information (authors, year, country, funding source), study  
26 objectives, intervention characteristics, design and methods, participants, descriptions of setting,  
27 contextual information (setting), findings, and authors' recommendations or tools.

### 36 **Data synthesis**

37  
38  
39 We expect considerable heterogeneity between studies; thus, meta-analysis may not be  
40 appropriate. Data will be synthesized using the guidance from the Centre for Reviews and  
41 Dissemination<sup>21</sup> and Popay et al.<sup>28</sup> Study characteristics will be tabulated and narratively  
42 synthesized to integrate and explore relationships within the data. We will also conduct a  
43 sensitivity analysis to examine the influence of studies with a low-quality rating on the  
44 robustness of review findings.<sup>29,30</sup> To do this, our synthesis (with all studies) will be compared  
45 *post hoc* to a synthesis without the methodologically weak studies. The criteria or threshold for  
46 *low quality* (e.g., data collection method, sampling) will be established *a priori*. This comparison  
47  
48  
49  
50  
51  
52  
53  
54  
55  
56  
57  
58  
59  
60

1  
2  
3 can provide insight into whether the low-quality studies contribute unique information and if  
4 they impact the generalizability of the findings.<sup>30</sup>  
5  
6  
7

### 8 **Patient and public involvement**

9

10  
11 Patients and/or the public were not and will not be involved in the design, conduct,  
12 reporting or dissemination plans of this research.  
13  
14  
15

### 16 **ETHICS AND DISSEMINATION**

17

18  
19 We are taking an integrated knowledge translation/mobilization approach<sup>31</sup> to this  
20 research in which our team of researcher/knowledge users have worked together to craft our  
21 research questions and refine our methodology. Our study team consists of knowledge users who  
22 are committed to utilizing their knowledge networks, existing relationships with internal/external  
23 policy makers, and dissemination pathways to accelerate the mobilization and uptake of our  
24 review findings at local, provincial, national, and international levels. The purpose of engaging a  
25 diverse interdisciplinary team of researchers and knowledge users to conduct this research is to  
26 accelerate, spread, and make use of this co-created knowledge, and yield evidence-based  
27 recommendations to inform innovative best practices in caring professional education.  
28  
29  
30  
31  
32  
33  
34  
35  
36  
37  
38

39  
40 End-of-grant approaches to knowledge dissemination will be mindful of COVID impacts  
41 on travel and will include virtual presentations at international, national, and local meetings and  
42 conferences. All team members, including graduate students, will be invited to participate in the  
43 publication of the review findings in a high impact, peer reviewed journal. We will leverage the  
44 connections of our knowledge users to develop an infographic, a short video, and an interactive  
45 website about digital technologies and educational innovations for caring professional education.  
46  
47  
48  
49  
50  
51  
52  
53 Furthermore, the findings from this synthesis project will be leveraged into a future research on  
54  
55  
56  
57  
58  
59  
60

1  
2  
3 implementation and evaluation of evidence-based digital technology and education innovation  
4  
5 within caring professional education.  
6  
7  
8  
9

10 **Author Contributions:** LN and DLL were responsible for the conceptualisation of the research  
11 question, approach, and rationale. LN and DLL developed the methods to be used for this  
12 review. LN, DLL, MJ, LL, and EOP provided initial research into existing literature and  
13 developed the introduction to this manuscript. LN prepared the first draft of the manuscript,  
14 which was reviewed and revised by DLL, MJ, LL, and EOP. All authors read and approved the  
15 final manuscript.  
16  
17  
18  
19  
20  
21  
22  
23

24 **Funding:** This research is funded from by a Social Sciences and Humanities Research Council  
25 of Canada Knowledge Synthesis Grant (872-2020-0026). LN holds a Teaching and Learning  
26 Research Professorship at the University of Calgary.  
27  
28  
29

30 **Competing interests:** None declared  
31  
32

33 **Patient consent of publication:** Not required  
34

35 **Provenance and peer review:** Not commissioned; externally peer reviewed.  
36  
37

38 **Open Access:** This is an open access article distributed in accordance with the Creative  
39 Commons Attribution Non Commercial (CC BY-NC 4.0) license, which permits others to  
40 distribute, remix, adapt, build upon this work non-commercially, and license their derivative  
41 works on different terms, provided the original work is properly cited, appropriate credit is  
42 given, any changes made indicated, and the use is non-commercial. See: [http://](http://creativecommons.org/licenses/by-nc/4.0/)  
43  
44  
45  
46  
47  
48  
49  
50  
51  
52  
53  
54  
55  
56  
57  
58  
59  
60



## REFERENCES

1. Watson J, Foster R. The Attending Nurse Caring Model: integrating theory, evidence and advanced caring-healing therapeutics for transforming professional practice: The Attending Nurse Caring Model ®. *J Clin Nurs*. 2003;12(3):360–5.
2. Wallis D. Satisfaction, stress, and performance: Issues for occupational psychology in the ‘caring’ professions. *Work Stress*. 1987;1(2):113–28.
3. Barron DN, West E. The emotional costs of caring incurred by men and women in the British labour market. *Soc Sci Med*. 2007;65(10):2160–71.
4. Dunlap JC, Lowenthal PR. Learning, unlearning, and relearning: Using Web 2.0 technologies to support the development of lifelong learning skills. In G. D. Magoulas (Ed.), *Einfrastructures and technologies for lifelong learning: Next generation environments*. 2011, Hershey, PA: IGI Global.
5. Future Skills Center. Co-operative Education and work-integrated learning Canada [Internet]. *Cewilcanada.ca*. [cited 2020 Dec 18]. Available from: <https://www.cewilcanada.ca/>
6. Almerud S, Alapack RJ, Fridlund B, Ekebergh M. Caught in an artificial split: a phenomenological study of being a caregiver in the technologically intense environment. *Intensive Crit Care Nurs*. 2008;24(2):130–6.
7. McGrath M. The challenges of caring in a technological environment: critical care nurses’ experiences. *J Clin Nurs*. 2008;17(8):1096–104.
8. Veletsianos G. Open educational resources: expanding equity or reflecting and furthering inequities? *Educ Technol Res Dev*. 2020;1–4.
9. Bottan N, Hoffmann B, Vera-Cossio D. The unequal impact of the coronavirus pandemic: Evidence from seventeen developing countries. *PLoS One*. 2020;15(10):e0239797.
10. Dorn A, Cooney RE, Sabin ML. COVID-19 exacerbating inequalities in the US. *Lancet*. 2020;395(10232):1243–4.
11. Wang Z, Tang K. Combating COVID-19: health equity matters. *Nat Med*. 2020;26(4):458.
12. Spencer JA. Electronic documentation and the caring nurse-patient relationship. *Int J Hum Caring*. 2010;14(2):29–34.
13. Bogo M. Field education for clinical social work practice: Best practices and contemporary challenges. *Clin Soc Work J*. 2015;43(3):317–24.
14. Dewart G, Corcoran L, Thirsk L, Petrovic K. Nursing education in a pandemic: Academic challenges in response to COVID-19. *Nurse Educ Today*. 2020;92(104471):104471.
15. Roskvist R, Eggleton K, Goodyear-Smith F. Provision of e-learning programmes to replace undergraduate medical students’ clinical general practice attachments during COVID-19 stand-down. *Educ Prim Care*. 2020;31(4):247–54.

16. Van Nuland S, Mandzuk D, Tucker Petrick K, Cooper T. COVID-19 and its effects on teacher education in Ontario: a complex adaptive systems perspective. *J Educ Teach*. 2020;46(4):442–51.
17. Hachey A, Wladis C, Conway K. Is the second time the charm? Investigating trends in online re-enrollment, retention and success. *J educ online* [Internet]. 2012;9(1). Available from: <http://dx.doi.org/10.9743/jeo.2012.1.2>
18. Oblinger, D.G. & Hawkings, B.L. The myth about online course development: A faculty member can individually develop and deliver an effective online course. *Educause Review*. 2006;41(1):14–5.
19. Jacobsen M, Brown B, Lambert D. Technology-enhanced learning environments in higher education: A review of the literature [Internet]. University of Calgary; 2013 [cited 2020 Dec 18]. Available from: <https://prism.ucalgary.ca/handle/1880/52244>
20. Moher D, Liberati A, Tetzlaff J, Altman DG, The PRISMA Group. Preferred reporting items for systematic reviews and meta-analyses: The PRISMA statement. *PLoS Med*. 2009;6(7):e1000097.
21. Centre for Reviews and Dissemination. Systematic reviews: CRD's guidance for undertaking reviews in health care. 2009.
22. Gough D. Qualitative and mixed methods in systematic reviews. *Syst Rev*. 2015;4(1):181.
23. Pope C, Mays N, Popay J. How can we synthesize qualitative and quantitative evidence for healthcare policy-makers and managers? *Healthc Manage Forum*. 2006 Spring;19(1):27–31.
24. Page MJ, McKenzie J, Bossuyt P, Boutron I, Hoffmann T, Mulrow C d., et al. The PRISMA 2020 statement: an updated guideline for reporting systematic reviews [Internet]. BITSS. 2020. Available from: <http://dx.doi.org/10.31222/osf.io/v7gm2>
25. Thomas J, Harden A. Methods for the thematic synthesis of qualitative research in systematic reviews. *BMC Med Res Methodol*. 2008;8(1):45.
26. Joanna Briggs Institute. JBI Critical Appraisal Checklist for Qualitative Research. Australia: Joanna Briggs Institute. 2017.
27. Hannes K, Lockwood C, Pearson A. A comparative analysis of three online appraisal instruments' ability to assess validity in qualitative research. *Qual Health Res*. 2010;20(12):1736–43.
28. Popay J, Roberts H, Sowden A., et al. Lancaster, UK: ESRC Research Methods Programme. Guidance on the conduct of narrative synthesis in systematic reviews. 2006.
29. Boeije HR, van Wesel F, Alisic E. Making a difference: towards a method for weighing the evidence in a qualitative synthesis: Weighing evidence in qualitative synthesis. *J Eval Clin Pract*. 2011;17(4):657–63.
30. Carroll C, Booth A. Quality assessment of qualitative evidence for systematic review and synthesis: Is it meaningful, and if so, how should it be performed?: Quality assessment of qualitative evidence. *Res Synth Methods*. 2015;6(2):149–54.

- 1  
2  
3 31. Graham ID, On behalf of the Integrated Knowledge Translation Research Network  
4 Project Leads, Kothari A, McCutcheon C. Moving knowledge into action for more  
5 effective practice, programmes and policy: protocol for a research programme on  
6 integrated knowledge translation. *Implement Sci* [Internet]. 2018;13(1). Available from:  
7 <http://dx.doi.org/10.1186/s13012-017-0700-y>  
8  
9  
10  
11  
12  
13  
14  
15  
16  
17  
18  
19  
20  
21  
22  
23  
24  
25  
26  
27  
28  
29  
30  
31  
32  
33  
34  
35  
36  
37  
38  
39  
40  
41  
42  
43  
44  
45  
46  
47  
48  
49  
50  
51  
52  
53  
54  
55  
56  
57  
58  
59  
60

## Supplementary File

Database: Ovid MEDLINE(R) and Epub Ahead of Print, In-Process & Other Non-Indexed Citations and Daily <1946 to December 15, 2020>

Search Strategy:

- 
- 1 exp education, medical, graduate/ or education, medical, undergraduate/ or education, nursing/ or education, nursing, baccalaureate/ or education, nursing, diploma programs/ or education, nursing, graduate/ or teacher training/ (152632)
  - 2 ((clinician\* or doctor\* or health profession\* or medical student\* or nurs\* or physician\* or psycholog\* or psychiatr\* or social work\* or teacher\*) adj3 (educat\* or professional development or train\*)).tw,kf. (101954)
  - 3 1 or 2 (226009)
  - 4 Telemedicine/ or Educational Technology/ or informatics.tw,kf. (41786)
  - 5 telemedicine/ or remote consultation/ (29366)
  - 6 exp Therapy, Computer-Assisted/ (66286)
  - 7 ((care or consultation\* or educat\* or healthcare or learning) adj3 (computer\* or digital or electronic or online)).tw,kf. (15071)
  - 8 (digital therapeutic\* or digital technolog\* or ehealth or e-health or e-support\* mobile health or mhealth or m-health or remote consult\* or teleconsult\* or tele-consult\* or telehealth or tele-health\* or telemedic\* or tele-medic\* or telepsychiatr\* or tele-psychiatr\* or teletherap\* or tele-therap\*).tw,kf. (35571)
  - 9 (online instruction or online learning or online teaching or digital econom\*).tw,kf. (2166)
  - 10 ((education\* or information\*) adj3 technolog\*).tw,kf. (22885)
  - 11 4 or 5 or 6 or 7 or 8 or 9 or 10 (161050)
  - 12 3 and 11 (6078)
  - 13 limit 12 to english language (5780)
  - 14 limit 13 to yr="2010 -Current" (3702)

# Reporting checklist for protocol of a systematic review.

Based on the PRISMA-P guidelines.

## Instructions to authors

Complete this checklist by entering the page numbers from your manuscript where readers will find each of the items listed below.

Your article may not currently address all the items on the checklist. Please modify your text to include the missing information. If you are certain that an item does not apply, please write "n/a" and provide a short explanation.

Upload your completed checklist as an extra file when you submit to a journal.

In your methods section, say that you used the PRISMA-Reporting guidelines, and cite them as:

Moher D, Shamseer L, Clarke M, Ghersi D, Liberati A, Petticrew M, Shekelle P, Stewart LA. Preferred Reporting Items for Systematic Review and Meta-Analysis Protocols (PRISMA-P) 2015 statement. Syst Rev. 2015;4(1):1.

|                |                     |                                                           | Page          |
|----------------|---------------------|-----------------------------------------------------------|---------------|
| Reporting Item |                     |                                                           | Number        |
| <b>Title</b>   |                     |                                                           |               |
| Identification | <a href="#">#1a</a> | Identify the report as a protocol of a systematic review  | Title<br>page |
| Update         | <a href="#">#1b</a> | If the protocol is for an update of a previous systematic | N/A           |

review, identify as such

## Registration

[#2](#) If registered, provide the name of the registry (such as PROSPERO) and registration number N/A

## Authors

[#3a](#) Provide name, institutional affiliation, e-mail address of all protocol authors; provide physical mailing address of corresponding author Title page

[#3b](#) Describe contributions of protocol authors and identify the guarantor of the review 13

## Amendments

[#4](#) If the protocol represents an amendment of a previously completed or published protocol, identify as such and list changes; otherwise, state plan for documenting important protocol amendments N/A

## Support

[#5a](#) Indicate sources of financial or other support for the review 13

[#5b](#) Provide name for the review funder and / or sponsor 13

[#5c](#) Describe roles of funder(s), sponsor(s), and / or institution(s), if any, in developing the protocol 13

## Introduction

|    |                      |                      |                                                                  |    |
|----|----------------------|----------------------|------------------------------------------------------------------|----|
| 1  | Rationale            | <a href="#">#6</a>   | Describe the rationale for the review in the context of what is  | 5  |
| 2  |                      |                      | already known                                                    |    |
| 3  |                      |                      |                                                                  |    |
| 4  |                      |                      |                                                                  |    |
| 5  |                      |                      |                                                                  |    |
| 6  | Objectives           | <a href="#">#7</a>   | Provide an explicit statement of the question(s) the review will | 8  |
| 7  |                      |                      | address with reference to participants, interventions,           |    |
| 8  |                      |                      | comparators, and outcomes (PICO)                                 |    |
| 9  |                      |                      |                                                                  |    |
| 10 |                      |                      |                                                                  |    |
| 11 |                      |                      |                                                                  |    |
| 12 |                      |                      |                                                                  |    |
| 13 |                      |                      |                                                                  |    |
| 14 | <b>Methods</b>       |                      |                                                                  |    |
| 15 |                      |                      |                                                                  |    |
| 16 |                      |                      |                                                                  |    |
| 17 | Eligibility criteria | <a href="#">#8</a>   | Specify the study characteristics (such as PICO, study design,   | 9  |
| 18 |                      |                      | setting, time frame) and report characteristics (such as years   |    |
| 19 |                      |                      | considered, language, publication status) to be used as          |    |
| 20 |                      |                      | criteria for eligibility for the review                          |    |
| 21 |                      |                      |                                                                  |    |
| 22 |                      |                      |                                                                  |    |
| 23 |                      |                      |                                                                  |    |
| 24 |                      |                      |                                                                  |    |
| 25 |                      |                      |                                                                  |    |
| 26 |                      |                      |                                                                  |    |
| 27 | Information          | <a href="#">#9</a>   | Describe all intended information sources (such as electronic    | 9  |
| 28 |                      |                      | databases, contact with study authors, trial registers or other  |    |
| 29 | sources              |                      | grey literature sources) with planned dates of coverage          |    |
| 30 |                      |                      |                                                                  |    |
| 31 |                      |                      |                                                                  |    |
| 32 |                      |                      |                                                                  |    |
| 33 |                      |                      |                                                                  |    |
| 34 |                      |                      |                                                                  |    |
| 35 | Search strategy      | <a href="#">#10</a>  | Present draft of search strategy to be used for at least one     | 9  |
| 36 |                      |                      | electronic database, including planned limits, such that it      |    |
| 37 |                      |                      | could be repeated                                                |    |
| 38 |                      |                      |                                                                  |    |
| 39 |                      |                      |                                                                  |    |
| 40 |                      |                      |                                                                  |    |
| 41 |                      |                      |                                                                  |    |
| 42 | Study records -      | <a href="#">#11a</a> | Describe the mechanism(s) that will be used to manage            | 10 |
| 43 | data management      |                      | records and data throughout the review                           |    |
| 44 |                      |                      |                                                                  |    |
| 45 |                      |                      |                                                                  |    |
| 46 |                      |                      |                                                                  |    |
| 47 |                      |                      |                                                                  |    |
| 48 | Study records -      | <a href="#">#11b</a> | State the process that will be used for selecting studies (such  | 10 |
| 49 | selection process    |                      | as two independent reviewers) through each phase of the          |    |
| 50 |                      |                      | review (that is, screening, eligibility and inclusion in meta-   |    |
| 51 |                      |                      | analysis)                                                        |    |
| 52 |                      |                      |                                                                  |    |
| 53 |                      |                      |                                                                  |    |
| 54 |                      |                      |                                                                  |    |
| 55 |                      |                      |                                                                  |    |
| 56 |                      |                      |                                                                  |    |
| 57 |                      |                      |                                                                  |    |
| 58 | Study records -      | <a href="#">#11c</a> | Describe planned method of extracting data from reports          | 11 |
| 59 |                      |                      |                                                                  |    |
| 60 |                      |                      |                                                                  |    |

|    |                    |                                                                                      |    |
|----|--------------------|--------------------------------------------------------------------------------------|----|
| 1  | data collection    | (such as piloting forms, done independently, in duplicate), any                      |    |
| 2  |                    |                                                                                      |    |
| 3  | process            | processes for obtaining and confirming data from investigators                       |    |
| 4  |                    |                                                                                      |    |
| 5  |                    |                                                                                      |    |
| 6  | Data items         | <a href="#">#12</a> List and define all variables for which data will be sought      | 11 |
| 7  |                    |                                                                                      |    |
| 8  |                    | (such as PICO items, funding sources), any pre-planned data                          |    |
| 9  |                    |                                                                                      |    |
| 10 |                    | assumptions and simplifications                                                      |    |
| 11 |                    |                                                                                      |    |
| 12 |                    |                                                                                      |    |
| 13 | Outcomes and       | <a href="#">#13</a> List and define all outcomes for which data will be sought,      | 11 |
| 14 |                    |                                                                                      |    |
| 15 | prioritization     | including prioritization of main and additional outcomes, with                       |    |
| 16 |                    | rationale                                                                            |    |
| 17 |                    |                                                                                      |    |
| 18 |                    |                                                                                      |    |
| 19 |                    |                                                                                      |    |
| 20 |                    |                                                                                      |    |
| 21 | Risk of bias in    | <a href="#">#14</a> Describe anticipated methods for assessing risk of bias of       | 10 |
| 22 |                    |                                                                                      |    |
| 23 | individual studies | individual studies, including whether this will be done at the                       |    |
| 24 |                    |                                                                                      |    |
| 25 |                    | outcome or study level, or both; state how this information will                     |    |
| 26 |                    |                                                                                      |    |
| 27 |                    | be used in data synthesis                                                            |    |
| 28 |                    |                                                                                      |    |
| 29 |                    |                                                                                      |    |
| 30 |                    |                                                                                      |    |
| 31 | Data synthesis     | <a href="#">#15a</a> Describe criteria under which study data will be quantitatively | 11 |
| 32 |                    |                                                                                      |    |
| 33 |                    | synthesised                                                                          |    |
| 34 |                    |                                                                                      |    |
| 35 |                    |                                                                                      |    |
| 36 | Data synthesis     | <a href="#">#15b</a> If data are appropriate for quantitative synthesis, describe    | 11 |
| 37 |                    |                                                                                      |    |
| 38 |                    | planned summary measures, methods of handling data and                               |    |
| 39 |                    |                                                                                      |    |
| 40 |                    | methods of combining data from studies, including any                                |    |
| 41 |                    |                                                                                      |    |
| 42 |                    | planned exploration of consistency (such as I <sup>2</sup> , Kendall's $\tau$ )      |    |
| 43 |                    |                                                                                      |    |
| 44 |                    |                                                                                      |    |
| 45 |                    |                                                                                      |    |
| 46 | Data synthesis     | <a href="#">#15c</a> Describe any proposed additional analyses (such as              | 11 |
| 47 |                    |                                                                                      |    |
| 48 |                    | sensitivity or subgroup analyses, meta-regression)                                   |    |
| 49 |                    |                                                                                      |    |
| 50 |                    |                                                                                      |    |
| 51 | Data synthesis     | <a href="#">#15d</a> If quantitative synthesis is not appropriate, describe the type | 11 |
| 52 |                    |                                                                                      |    |
| 53 |                    | of summary planned                                                                   |    |
| 54 |                    |                                                                                      |    |
| 55 |                    |                                                                                      |    |
| 56 |                    |                                                                                      |    |
| 57 | Meta-bias(es)      | <a href="#">#16</a> Specify any planned assessment of meta-bias(es) (such as         | 11 |
| 58 |                    |                                                                                      |    |
| 59 |                    |                                                                                      |    |
| 60 |                    |                                                                                      |    |



1 publication bias across studies, selective reporting within  
2  
3 studies)  
4

5  
6 Confidence in [#17](#) Describe how the strength of the body of evidence will be 11  
7  
8 cumulative assessed (such as GRADE)  
9  
10 evidence  
11  
12

13 None The PRISMA-P checklist is distributed under the terms of the Creative Commons Attribution  
14 License CC-BY 4.0. This checklist can be completed online using <https://www.goodreports.org/>, a tool  
15  
16 made by the [EQUATOR Network](#) in collaboration with [Penelope.ai](#)  
17  
18  
19  
20  
21  
22  
23  
24  
25  
26  
27  
28  
29  
30  
31  
32  
33  
34  
35  
36  
37  
38  
39  
40  
41  
42  
43  
44  
45  
46  
47  
48  
49  
50  
51  
52  
53  
54  
55  
56  
57  
58  
59  
60

# BMJ Open

## Translating caring competencies to remote working environments: A systematic review protocol

|                                 |                                                                                                                                                                                                                                                                                                                                                                                                                         |
|---------------------------------|-------------------------------------------------------------------------------------------------------------------------------------------------------------------------------------------------------------------------------------------------------------------------------------------------------------------------------------------------------------------------------------------------------------------------|
| Journal:                        | <i>BMJ Open</i>                                                                                                                                                                                                                                                                                                                                                                                                         |
| Manuscript ID                   | bmjopen-2020-048459.R1                                                                                                                                                                                                                                                                                                                                                                                                  |
| Article Type:                   | Protocol                                                                                                                                                                                                                                                                                                                                                                                                                |
| Date Submitted by the Author:   | 20-Apr-2021                                                                                                                                                                                                                                                                                                                                                                                                             |
| Complete List of Authors:       | Nowell, Lorelli S; University of Calgary<br>Lorenzetti, Diane; University of Calgary, Department of Surgery;<br>University of Calgary, Department of Surgery<br>Jacobsen, Michele; University of Calgary<br>Lorenzetti, Liza; University of Calgary<br>Paolucci, Elizabeth Oddone; University of Calgary, Department of<br>Community Health Sciences; University of Calgary, Department of<br>Community Health Sciences |
| <b>Primary Subject Heading</b>: | Medical education and training                                                                                                                                                                                                                                                                                                                                                                                          |
| Secondary Subject Heading:      | Research methods                                                                                                                                                                                                                                                                                                                                                                                                        |
| Keywords:                       | EDUCATION & TRAINING (see Medical Education & Training), MEDICAL EDUCATION & TRAINING, Information technology < BIOTECHNOLOGY & BIOINFORMATICS, Telemedicine < BIOTECHNOLOGY & BIOINFORMATICS                                                                                                                                                                                                                           |
|                                 |                                                                                                                                                                                                                                                                                                                                                                                                                         |

SCHOLARONE™  
Manuscripts



I, the Submitting Author has the right to grant and does grant on behalf of all authors of the Work (as defined in the below author licence), an exclusive licence and/or a non-exclusive licence for contributions from authors who are: i) UK Crown employees; ii) where BMJ has agreed a CC-BY licence shall apply, and/or iii) in accordance with the terms applicable for US Federal Government officers or employees acting as part of their official duties; on a worldwide, perpetual, irrevocable, royalty-free basis to BMJ Publishing Group Ltd ("BMJ") its licensees and where the relevant Journal is co-owned by BMJ to the co-owners of the Journal, to publish the Work in this journal and any other BMJ products and to exploit all rights, as set out in our [licence](#).

The Submitting Author accepts and understands that any supply made under these terms is made by BMJ to the Submitting Author unless you are acting as an employee on behalf of your employer or a postgraduate student of an affiliated institution which is paying any applicable article publishing charge ("APC") for Open Access articles. Where the Submitting Author wishes to make the Work available on an Open Access basis (and intends to pay the relevant APC), the terms of reuse of such Open Access shall be governed by a Creative Commons licence – details of these licences and which [Creative Commons](#) licence will apply to this Work are set out in our licence referred to above.

Other than as permitted in any relevant BMJ Author's Self Archiving Policies, I confirm this Work has not been accepted for publication elsewhere, is not being considered for publication elsewhere and does not duplicate material already published. I confirm all authors consent to publication of this Work and authorise the granting of this licence.

# Translating caring competencies to remote working environments: A systematic review protocol

Lorelli Nowell<sup>1</sup>, Diane L. Lorenzetti<sup>2,6</sup>, Michele Jacobsen<sup>3</sup>, Liza Lorenzetti<sup>4</sup>, Elizabeth Oddone  
Paolucci<sup>5,6</sup>

<sup>1</sup>Faculty of Nursing, University of Calgary, 2500 University Drive NW, Calgary, AB, CANADA T2N1N4, [lnowell@ucalgary.ca](mailto:lnowell@ucalgary.ca)

<sup>2</sup>Health Sciences Library, University of Calgary, 3330 Hospital Drive NW, Calgary, AB, T2N4N1, [dllorenz@ucalgary.ca](mailto:dllorenz@ucalgary.ca)

<sup>3</sup>Werklund School of Education, 2500 University Drive NW, Calgary, AB, CANADA T2N1N4, [dmjacobs@ucalgary.ca](mailto:dmjacobs@ucalgary.ca)

<sup>4</sup>Faculty of Social Work, University of Calgary, 2500 University Drive NW, Calgary, AB, CANADA T2N1N4, [lakloren@ucalgary.ca](mailto:lakloren@ucalgary.ca)

<sup>5</sup>Department of Community Health Sciences, Cumming School of Medicine, University of Calgary, 3280 Hospital Drive NW, Calgary, AB, CANADA T2N4Z6, [eoddone@ucalgary.ca](mailto:eoddone@ucalgary.ca)

<sup>6</sup>Department of Surgery, Cumming School of Medicine, University of Calgary, 3280 Hospital Drive NW, Calgary, AB, CANADA T2N4Z6, [eoddone@ucalgary.ca](mailto:eoddone@ucalgary.ca)

## Corresponding Author

Name: Lorelli Nowell

Postal address: 2500 University Drive NW, Calgary, AB, CANADA, T2N1N4

Telephone: +1403-620-9822

Fax number: 403-284-4803

**Word count:** 3638

## ABSTRACT

**Introduction:** Caring professions attend to the health, educational, and social needs of society rather than its material needs. Caring professionals are a vital part of the world's response to COVID-19, yet the global pandemic and its aftermath have significantly changed the ways in which care is provided. The rapid pivot to remote care, where the essential caring cues and opportunities are not as readily available, has put unprecedented pressure on caring professions. There is currently a lack of clear understanding and accepted standards for teaching caring profession students how to provide care remotely. The objective of this systematic review is to identify and assess the ways in which educators can integrate online learning opportunities to help students develop effective caring practices and translate these into today's remote and virtual care environments.

**Methods and analysis:** This systematic review will consider diverse quantitative, qualitative, and mixed-methods studies of innovative online education initiatives and required technology for caring profession education. Articles will be retrieved from academic databases and limited to articles reporting primary data and published in English within the last 10 years. Data extraction procedures will follow the Preferred Reporting Items for Systematic Reviews and Meta-Analyses reporting guideline. The methodological quality of all studies will be assessed using the Effective Public Health Practice Project Quality Assessment Tool (EPHPP) and/or the Joanna Briggs Institute Critical Appraisal Checklist for Qualitative Research. Study characteristics will be tabulated and narratively synthesized to integrate and explore relationships within the data.

**Ethics and dissemination:** No ethics approval is required to conduct this review. Review findings will be disseminated through peer-reviewed publications, conference presentations and be used to inform and guide caring profession education policy, practice, and research agendas

1  
2  
3 with the goal of improving education for caring profession students, and care for the patients,  
4  
5 clients and learners they serve.  
6  
7  
8  
9  
10  
11  
12  
13  
14  
15  
16  
17  
18  
19  
20  
21  
22  
23  
24  
25  
26  
27  
28  
29  
30  
31  
32  
33  
34  
35  
36  
37  
38  
39  
40  
41  
42  
43  
44  
45  
46  
47  
48  
49  
50  
51  
52  
53  
54  
55  
56  
57  
58  
59  
60

For peer review only

### STRENGTHS AND LIMITATIONS OF THIS STUDY

- This is the first systematic review to appraise and synthesize existing studies on integrating online learning opportunities to help students develop effective caring practices and translate them into today's remote and virtual care environments.
- We adhere to the Preferred Reporting Items for Systematic Reviews and Meta-Analysis Protocols (PRISMA-P) statement to ensure a systematic and rigorous approach to our review.
- The integration of both quantitative and qualitative data from multiple caring professions will generate evidence from multiple paradigms and disciplines.
- Only English language articles published in the last 10 years will be included, therefore this review may overlook relevant contributions from other widely used languages or those published more than 10 years ago.
- The diverse studies included in this review may include a variety of heterogeneous factors, making synthesis more challenging.

## INTRODUCTION

Caring professions, such as Education, Medicine, Nursing, Social Work, and Allied Health disciplines involve attending to health, well-being, and development, and encompass a humanitarian and human science orientation, and require human caring processes.<sup>1</sup> These professionals are employed to meet the health, educational, and social needs of society rather than its material needs<sup>2</sup> and are often in close, face-to-face contact with the recipients of their services.<sup>3</sup> Caring professionals deliver essential services that provide education, promote health and well-being, and support and advocate for individuals, families and communities in need – services at the heart of the world’s response to COVID-19.

The COVID-19 pandemic has shone a spotlight on the importance of access to digital tools in the workplace as caring professionals quickly pivoted to using technology to support their students, patients, and clients. Digital skills went from a "nice to have" to a “vital skill” as caring professionals were expected to seamlessly bridge technical competence with caring expertise. Caring work is almost always provided in the context of a relationship and therefore social and relational skills are required<sup>3</sup> as key components of discipline-specific skillsets. However, rapidly changing technological advancements have altered the skills and competencies required of the present and future work force.<sup>4,5</sup>

Caring professionals and higher education institutions are facing the challenges of learning to become proficient with technology for communication, connection, and collaboration. Though expert professionals may be able to more easily shift their focus from face-to-face to remote and virtual care, and back again, novice caring professionals may struggle with translating their caring or teaching skills to digital environments and resources, causing significant personal and professional repercussions.<sup>6,7</sup> When technology fails to help deliver the



1  
2  
3 expected care, both patients and care providers may experience anguish.<sup>7</sup> The growing use of  
4 open educational resources in higher education can address some equity and inclusion issues, but  
5 also raise new questions about representation, authorship, and perspective.<sup>8</sup> The onset of  
6 COVID-19 highlights the urgent need for caring professionals to develop the skills and  
7 competencies required to best meet the needs of the public they serve. Without these skills, the  
8 negative education, health, and social outcomes made more apparent by the pandemic, such as  
9 economic inequality, food security and inadequate access to health care<sup>9</sup> or schooling, may be  
10 exacerbated.

11  
12  
13  
14  
15  
16  
17  
18  
19  
20  
21  
22 Global attention has largely focused on risks to students going back to school, infected  
23 patients and the frontline responders, with some marginalised populations in society being  
24 overlooked.<sup>10</sup> Global efforts cannot ignore socio-economic, health and education equity, and it is  
25 imperative that digital technologies are used to ensure equal treatment and educational  
26 opportunities for all.<sup>11</sup> As specialized technologies are increasingly being developed and  
27 implemented to meet the needs of dynamic work environments, more time and resources are  
28 required to ensure that educators and students can efficiently use and master the technical aspects  
29 of their evolving roles.<sup>12</sup> Despite this pressing need, the literature lacks coherent, evidence-based  
30 direction about how educators can best integrate online learning opportunities to help students  
31 develop caring competencies and translate them to a digital working environment. This review  
32 will provide direction from across caring disciplines; specifically, those which are unified in  
33 requiring social skills to manage and maintain interpersonal relationships as central to their  
34 profession.

### 35 36 37 38 39 40 41 42 43 44 45 46 47 48 49 50 51 **Caring professional training and education**

1  
2  
3 Historically, caring professional education has been delivered using traditional face-to-  
4 face lecture, experiential and group in-class learning, and seminar formats. Education was often  
5 offered in tandem with work-integrated learning where students work with educators and  
6 practicing health professionals in placements to learn the hands-on skills, dispositions, and  
7 competencies required in the field (e.g., K-12 classrooms, hospital settings, counselling  
8 centers).<sup>5,13</sup> However, COVID -19 caused a sudden pivot to remote online teaching and learning  
9 contexts where caring professional training programs were required to implement alternative  
10 strategies to provide students with these valuable experiences and learning opportunities.<sup>14-16</sup>  
11 Rather than supplementing in-person instruction/experiences, online learning has become the  
12 mainstay, highlighting the need for professional programs to ensure the capacity of their students  
13 to operate confidently in online learning environments. While higher education has increased  
14 formal online learning opportunities for students over the last decade<sup>17</sup> educators often have  
15 limited awareness of and proficiency with technology required for today's workforce<sup>18</sup> and few  
16 have developed shared epistemic agency for leading these innovations.<sup>19</sup>  
17  
18  
19  
20  
21  
22  
23  
24  
25  
26  
27  
28  
29  
30  
31  
32  
33  
34  
35

36 Educators must enable caring profession students to become confident and effective users  
37 of technology. COVID-19 has demanded that teachers and students become comfortable in the  
38 use of various technologies to support teaching and learning. More broadly, the COVID-19  
39 pandemic has highlighted the need for educators to introduce students to technologies that have  
40 become crucial for providing essential care, communication, and learning connections. Educators  
41 are confronted with the dilemma of responding and adapting quickly to this increasingly critical  
42 emphasis on designing and supporting online educational environments. It is imperative to  
43 effectively support ongoing education and training to provide caring professionals with the  
44  
45  
46  
47  
48  
49  
50  
51  
52  
53  
54  
55  
56  
57  
58  
59  
60

1  
2  
3 required skills and competencies to ensure that they are able to persevere through the challenges  
4  
5 of the current pandemic and beyond.  
6  
7

## 8 **GOALS AND OBJECTIVES**

9

10 The objective of this mixed methods systematic review is to identify the ways in which  
11 innovative online education initiatives can best prepare graduates in caring professions for  
12 employment and competent and effective practice in the digital economy. We will identify  
13 knowledge strengths and gaps, including the applicability and/or transferability of strategies and  
14 practices to the wider band of interdisciplinary caring professional education contexts. The  
15 research questions that will guide this review are:  
16  
17  
18  
19  
20  
21  
22  
23

- 24 1. In what ways have digital technologies transformed the nature of professional education  
25 and prepared students to operate in emerging digital economies within the caring  
26 professions?  
27  
28  
29  
30
- 31 2. In what ways has COVID-19 driven innovation in caring professional education?  
32  
33
- 34 3. What educational strategies have proved to be most effective in preparing students to  
35 operate effectively in digital economies?  
36  
37

## 38 **METHODS AND ANALYSIS**

39

40 This protocol follows the Preferred Reporting Items for Systematic Reviews and Meta-  
41 Analysis Protocols (PRISMA-P) statement.<sup>20</sup> The mixed methods systematic review will follow  
42 the best practice outlines by the Centre for Reviews and Dissemination<sup>21</sup> by combining the  
43 findings of diverse primary studies within a single review.<sup>22,23</sup> This review will adhere to the  
44 Preferred Reporting Items for Systematic Reviews and Meta-Analysis Protocols (PRISMA)  
45 guidelines for the progress and reporting of systematic reviews.<sup>20,24</sup>  
46  
47  
48  
49  
50  
51  
52  
53

### 54 **Inclusion criteria**

55  
56  
57  
58  
59  
60

1  
2  
3 Studies will be included if they: (1) focus on the education of undergraduate and/or  
4 graduate students in the caring profession disciplines (Education, Medicine, Nursing, Social  
5 Work, and Allied Health); (2) describe current strategies to offer online learning designed to  
6 prepare students to operate in emerging digital economies; and (3) report on the impact of  
7 implementing these strategies including student and teacher perspectives, learning outcomes,  
8 capacity of students to develop career skills and competencies, and patient or learner  
9 perspectives.  
10  
11  
12  
13  
14  
15  
16  
17  
18

### 19 **Exclusion criteria**

20  
21 Studies will be excluded if they: (1) focus on the continuing education of professionals  
22 currently in practice; (2) are commentaries, editorials, letters or non-systematic reviews that do  
23 not report on outcomes or impact associated with online education; (3) have not been published  
24 within the last 10 years; and (4) are non-English language studies. We are limiting our inclusion  
25 to studies published within the last 10 years to capture the most recent and relevant online  
26 technologies, pedagogies, and practices.  
27  
28  
29  
30  
31  
32  
33  
34

### 35 **Search strategy**

36  
37 We will search the following multidisciplinary databases to identify English language  
38 journal articles suitable for inclusion in this review: CINAHL, Education Research Complete,  
39 EMBASE, ERIC, MEDLINE, Social Service Abstracts, Social Work Abstracts, and Scopus. The  
40 search strategy will incorporate database-specific subject headings (as appropriate) and keywords  
41 (title/abstract words) from three main concepts: (1) students currently registered in caring  
42 profession educations programs in academic institutions (allied health, education, medicine,  
43 nursing, social work); (2) pedagogical approaches or technologies to facilitate online learning;  
44 and (3) outcomes related to preparing students to work in emerging digital economies (e.g.,  
45  
46  
47  
48  
49  
50  
51  
52  
53  
54  
55  
56  
57  
58  
59  
60

1  
2  
3 learning outcomes and career skills development, as well student, teacher, and stakeholder  
4 perspectives). A preliminary search strategy for MEDLINE database was completed by the  
5  
6 team's health science librarian DLL, in consultation with the team (see online supplementary  
7  
8 file). This search strategy will be further developed and adapted for different databases. We will  
9  
10 also hand search the reference lists of all eligible studies to identify additional studies of  
11  
12 relevance to this review.  
13  
14  
15

### 16 **Study Selection**

17  
18  
19 All search results will be exported to Covidence to facilitate data management and the  
20  
21 organization and progress of this review. Studies will be screened in three stages. Prior to  
22  
23 screening, reviewers will independently screen a random sample of 50 abstracts using a  
24  
25 standardized screening tool in Excel to determine inter-rater reliability. Screening of the  
26  
27 remaining abstracts will commence when inter-rater agreement reaches 90%, at which point  
28  
29 titles and abstracts (Level 1) will be independently screened in duplicate by two reviewers.  
30  
31 Disagreements will be resolved by a third reviewer. Full texts of potential studies will be  
32  
33 obtained for Level 2 screening, which will be conducted in the same manner as Level 1  
34  
35 screening.  
36  
37  
38  
39

### 40 **Assessment of methodological quality and risk of bias**

41  
42 The methodological quality of quantitative studies will be assessed using the Effective  
43  
44 Public Health Practice Project Quality Assessment Tool (EPHPP),<sup>25</sup> which can be used to assess  
45  
46 multiple study designs and has evidence of validity and reliability. Each of six domains—  
47  
48 selection bias, study design, confounders, blinding, data collection methods, and withdrawals and  
49  
50 drop-outs—are rated as strong, moderate, weak, or not applicable. For qualitative studies, we  
51  
52 will use the Joanna Briggs Institute Critical Appraisal Checklist for Qualitative Research.<sup>26</sup> This  
53  
54  
55  
56  
57  
58  
59  
60

1  
2  
3 coherent tool performs well in assessing intrinsic methodological quality.<sup>27</sup> Ten domains are  
4 assessed as yes, no, unclear, or not applicable: philosophy, objective, data collection, data  
5 analysis, interpretation of results, theory or cultural location, researcher reflexivity, participant  
6 representation, ethical considerations, conclusion. For mixed methods studies, we will use both  
7 appraisal tools. These tools will enable us to identify higher quality evidence and practices  
8 among the literature. Two reviewers will independently assess the quality of all included studies.  
9 Disagreements will be resolved through discussion or adjudication by a third reviewer.  
10  
11  
12  
13  
14  
15  
16  
17  
18

### 19 **Data extraction**

20  
21  
22 We will use a standardized Excel data extraction tool, which will be pilot tested by the  
23 reviewers using a random sample of five studies. Following the pilot test, one reviewer will  
24 extract study data; a second reviewer will verify the extracted data for accuracy. The following  
25 data items will be extracted: study information (authors, year, country, funding source), study  
26 objectives, intervention characteristics, design and methods, participants, descriptions of setting,  
27 contextual information (setting), findings, and authors' recommendations or tools.  
28  
29  
30  
31  
32  
33  
34  
35

### 36 **Data synthesis**

37  
38  
39 We expect considerable heterogeneity between studies; thus, meta-analysis may not be  
40 appropriate. Data will be synthesized using the guidance from the Centre for Reviews and  
41 Dissemination<sup>21</sup> and Popay et al.<sup>28</sup> Study characteristics will be tabulated and narratively  
42 synthesized to integrate and explore relationships within the data. We will also conduct a  
43 sensitivity analysis to examine the influence of studies with a low-quality rating on the  
44 robustness of review findings.<sup>29,30</sup> To do this, our synthesis (with all studies) will be compared  
45 *post hoc* to a synthesis without the methodologically weak studies. The criteria or threshold for  
46 *low quality* (e.g., data collection method, sampling) will be established *a priori*. This comparison  
47  
48  
49  
50  
51  
52  
53  
54  
55  
56  
57  
58  
59  
60

1  
2  
3 can provide insight into whether the low-quality studies contribute unique information and if  
4 they impact the generalizability of the findings.<sup>30</sup>  
5  
6  
7

### 8 **Patient and public involvement**

9

10  
11 Patients and/or the public were not and will not be involved in the design, conduct,  
12 reporting or dissemination plans of this research.  
13  
14  
15

### 16 **ETHICS AND DISSEMINATION**

17

18  
19 We are taking an integrated knowledge translation/mobilization approach<sup>31</sup> to this  
20 research in which our team of researcher/knowledge users have worked together to craft our  
21 research questions and refine our methodology. Our study team consists of knowledge users who  
22 are committed to utilizing their knowledge networks, existing relationships with internal/external  
23 policy makers, and dissemination pathways to accelerate the mobilization and uptake of our  
24 review findings at local, provincial, national, and international levels. The purpose of engaging a  
25 diverse interdisciplinary team of researchers and knowledge users to conduct this research is to  
26 accelerate, spread, and make use of this co-created knowledge, and yield evidence-based  
27 recommendations to inform innovative best practices in caring professional education.  
28  
29  
30  
31  
32  
33  
34  
35  
36  
37  
38

39  
40 End-of-grant approaches to knowledge dissemination will be mindful of COVID impacts  
41 on travel and will include virtual presentations at international, national, and local meetings and  
42 conferences. All team members, including graduate students, will be invited to participate in the  
43 publication of the review findings in a high impact, peer reviewed journal. We will leverage the  
44 connections of our knowledge users to develop an infographic, a short video, and an interactive  
45 website about digital technologies and educational innovations for caring professional education.  
46  
47  
48  
49  
50  
51  
52  
53 Furthermore, the findings from this synthesis project will be leveraged into a future research on  
54  
55  
56  
57  
58  
59  
60

1  
2  
3 implementation and evaluation of evidence-based digital technology and education innovation  
4  
5 within caring professional education.  
6  
7  
8  
9

10 **Author Contributions:** LN and DLL were responsible for the conceptualisation of the research  
11 question, approach, and rationale. LN and DLL developed the methods to be used for this  
12 review. LN, DLL, MJ, LL, and EOP provided initial research into existing literature and  
13 developed the introduction to this manuscript. LN prepared the first draft of the manuscript,  
14 which was reviewed and revised by DLL, MJ, LL, and EOP. All authors read and approved the  
15 final manuscript.  
16  
17  
18  
19  
20  
21  
22

23 **Data availability:** Data sharing not applicable as no datasets generated and/or analysed for this  
24 study  
25  
26  
27

28 **Funding:** This work was supported by the Social Sciences and Humanities Research Council  
29 and the Government of Canada's Future Skills program grant number (872-2020-0026).  
30  
31  
32

33 **Competing interests:** None declared  
34

35 **Patient consent of publication:** Not required  
36

37 **Provenance and peer review:** Not commissioned; externally peer reviewed.  
38  
39

40 **Open Access:** This is an open access article distributed in accordance with the Creative  
41 Commons Attribution Non Commercial (CC BY-NC 4.0) license, which permits others to  
42 distribute, remix, adapt, build upon this work non-commercially, and license their derivative  
43 works on different terms, provided the original work is properly cited, appropriate credit is  
44 given, any changes made indicated, and the use is non-commercial. See: [http://](http://creativecommons.org/licenses/by-nc/4.0/)  
45  
46  
47  
48  
49  
50  
51  
52  
53  
54  
55  
56  
57  
58  
59  
60



## REFERENCES

1. Watson J, Foster R. The Attending Nurse Caring Model: integrating theory, evidence and advanced caring-healing therapeutics for transforming professional practice: The Attending Nurse Caring Model ®. *J Clin Nurs*. 2003;12(3):360–5.
2. Wallis D. Satisfaction, stress, and performance: Issues for occupational psychology in the ‘caring’ professions. *Work Stress*. 1987;1(2):113–28.
3. Barron DN, West E. The emotional costs of caring incurred by men and women in the British labour market. *Soc Sci Med*. 2007;65(10):2160–71.
4. Dunlap JC, Lowenthal PR. Learning, unlearning, and relearning: Using Web 2.0 technologies to support the development of lifelong learning skills. In G. D. Magoulas (Ed.), *Einfrastructures and technologies for lifelong learning: Next generation environments*. 2011, Hershey, PA: IGI Global.
5. Future Skills Center. Co-operative Education and work-integrated learning Canada [Internet]. *Cewilcanada.ca*. [cited 2020 Dec 18]. Available from: <https://www.cewilcanada.ca/>
6. Almerud S, Alapack RJ, Fridlund B, Ekebergh M. Caught in an artificial split: a phenomenological study of being a caregiver in the technologically intense environment. *Intensive Crit Care Nurs*. 2008;24(2):130–6.
7. McGrath M. The challenges of caring in a technological environment: critical care nurses’ experiences. *J Clin Nurs*. 2008;17(8):1096–104.
8. Veletsianos G. Open educational resources: expanding equity or reflecting and furthering inequities? *Educ Technol Res Dev*. 2020;1–4.
9. Bottan N, Hoffmann B, Vera-Cossio D. The unequal impact of the coronavirus pandemic: Evidence from seventeen developing countries. *PLoS One*. 2020;15(10):e0239797.
10. Dorn A, Cooney RE, Sabin ML. COVID-19 exacerbating inequalities in the US. *Lancet*. 2020;395(10232):1243–4.
11. Wang Z, Tang K. Combating COVID-19: health equity matters. *Nat Med*. 2020;26(4):458.
12. Spencer JA. Electronic documentation and the caring nurse-patient relationship. *Int J Hum Caring*. 2010;14(2):29–34.
13. Bogo M. Field education for clinical social work practice: Best practices and contemporary challenges. *Clin Soc Work J*. 2015;43(3):317–24.
14. Dewart G, Corcoran L, Thirsk L, Petrovic K. Nursing education in a pandemic: Academic challenges in response to COVID-19. *Nurse Educ Today*. 2020;92(104471):104471.

15. Roskvist R, Eggleton K, Goodyear-Smith F. Provision of e-learning programmes to replace undergraduate medical students' clinical general practice attachments during COVID-19 stand-down. *Educ Prim Care*. 2020;31(4):247–54.
16. Van Nuland S, Mandzuk D, Tucker Petrick K, Cooper T. COVID-19 and its effects on teacher education in Ontario: a complex adaptive systems perspective. *J Educ Teach*. 2020;46(4):442–51.
17. Hachey A, Wladis C, Conway K. Is the second time the charm? Investigating trends in online re-enrollment, retention and success. *J educ online* [Internet]. 2012;9(1). Available from: <http://dx.doi.org/10.9743/jeo.2012.1.2>
18. Oblinger, D.G. & Hawkins, B.L. The myth about online course development: A faculty member can individually develop and deliver an effective online course. *Educause Review*. 2006;41(1):14–5.
19. Jacobsen M, Brown B, Lambert D. Technology-enhanced learning environments in higher education: A review of the literature [Internet]. University of Calgary; 2013 [cited 2020 Dec 18]. Available from: <https://prism.ucalgary.ca/handle/1880/52244>
20. Moher D, Liberati A, Tetzlaff J, Altman DG, The PRISMA Group. Preferred reporting items for systematic reviews and meta-analyses: The PRISMA statement. *PLoS Med*. 2009;6(7):e1000097.
21. Centre for Reviews and Dissemination. Systematic reviews: CRD's guidance for undertaking reviews in health care. 2009.
22. Gough D. Qualitative and mixed methods in systematic reviews. *Syst Rev*. 2015;4(1):181.
23. Pope C, Mays N, Popay J. How can we synthesize qualitative and quantitative evidence for healthcare policy-makers and managers? *Healthc Manage Forum*. 2006 Spring;19(1):27–31.
24. Page MJ, McKenzie J, Bossuyt P, Boutron I, Hoffmann T, Mulrow C d., et al. The PRISMA 2020 statement: an updated guideline for reporting systematic reviews [Internet]. BITSS. 2020. Available from: <http://dx.doi.org/10.31222/osf.io/v7gm2>
25. Thomas J, Harden A. Methods for the thematic synthesis of qualitative research in systematic reviews. *BMC Med Res Methodol*. 2008;8(1):45.
26. Joanna Briggs Institute. JBI Critical Appraisal Checklist for Qualitative Research. Australia: Joanna Briggs Institute. 2017.
27. Hannes K, Lockwood C, Pearson A. A comparative analysis of three online appraisal instruments' ability to assess validity in qualitative research. *Qual Health Res*. 2010;20(12):1736–43.
28. Popay J, Roberts H, Sowden A., et al. Lancaster, UK: ESRC Research Methods Programme. Guidance on the conduct of narrative synthesis in systematic reviews. 2006.
29. Boeije HR, van Wesel F, Alisic E. Making a difference: towards a method for weighing the evidence in a qualitative synthesis: Weighing evidence in qualitative synthesis. *J Eval Clin Pract*. 2011;17(4):657–63.

- 1
- 2
- 3 30. Carroll C, Booth A. Quality assessment of qualitative evidence for systematic review and
- 4 synthesis: Is it meaningful, and if so, how should it be performed?: Quality assessment of
- 5 qualitative evidence. *Res Synth Methods*. 2015;6(2):149–54.
- 6
- 7 31. Graham ID, On behalf of the Integrated Knowledge Translation Research Network
- 8 Project Leads, Kothari A, McCutcheon C. Moving knowledge into action for more
- 9 effective practice, programmes and policy: protocol for a research programme on
- 10 integrated knowledge translation. *Implement Sci* [Internet]. 2018;13(1). Available from:
- 11 <http://dx.doi.org/10.1186/s13012-017-0700-y>
- 12
- 13
- 14
- 15
- 16
- 17
- 18
- 19
- 20
- 21
- 22
- 23
- 24
- 25
- 26
- 27
- 28
- 29
- 30
- 31
- 32
- 33
- 34
- 35
- 36
- 37
- 38
- 39
- 40
- 41
- 42
- 43
- 44
- 45
- 46
- 47
- 48
- 49
- 50
- 51
- 52
- 53
- 54
- 55
- 56
- 57
- 58
- 59
- 60

## Supplementary File

Database: Ovid MEDLINE(R) and Epub Ahead of Print, In-Process & Other Non-Indexed Citations and Daily <1946 to December 15, 2020>

Search Strategy:

- 
- 1 exp education, medical, graduate/ or education, medical, undergraduate/ or education, nursing/ or education, nursing, baccalaureate/ or education, nursing, diploma programs/ or education, nursing, graduate/ or teacher training/ (152632)
  - 2 ((clinician\* or doctor\* or health profession\* or medical student\* or nurs\* or physician\* or psycholog\* or psychiatr\* or social work\* or teacher\*) adj3 (educat\* or professional development or train\*)).tw,kf. (101954)
  - 3 1 or 2 (226009)
  - 4 Telemedicine/ or Educational Technology/ or informatics.tw,kf. (41786)
  - 5 telemedicine/ or remote consultation/ (29366)
  - 6 exp Therapy, Computer-Assisted/ (66286)
  - 7 ((care or consultation\* or educat\* or healthcare or learning) adj3 (computer\* or digital or electronic or online)).tw,kf. (15071)
  - 8 (digital therapeutic\* or digital technolog\* or ehealth or e-health or e-support\* mobile health or mhealth or m-health or remote consult\* or teleconsult\* or tele-consult\* or telehealth or tele-health\* or telemedic\* or tele-medic\* or telepsychiatr\* or tele-psychiatr\* or teletherap\* or tele-therap\*).tw,kf. (35571)
  - 9 (online instruction or online learning or online teaching or digital econom\*).tw,kf. (2166)
  - 10 ((education\* or information\*) adj3 technolog\*).tw,kf. (22885)
  - 11 4 or 5 or 6 or 7 or 8 or 9 or 10 (161050)
  - 12 3 and 11 (6078)
  - 13 limit 12 to english language (5780)
  - 14 limit 13 to yr="2010 -Current" (3702)

# Reporting checklist for protocol of a systematic review.

Based on the PRISMA-P guidelines.

## Instructions to authors

Complete this checklist by entering the page numbers from your manuscript where readers will find each of the items listed below.

Your article may not currently address all the items on the checklist. Please modify your text to include the missing information. If you are certain that an item does not apply, please write "n/a" and provide a short explanation.

Upload your completed checklist as an extra file when you submit to a journal.

In your methods section, say that you used the PRISMA-Reporting guidelines, and cite them as:

Moher D, Shamseer L, Clarke M, Ghersi D, Liberati A, Petticrew M, Shekelle P, Stewart LA. Preferred Reporting Items for Systematic Review and Meta-Analysis Protocols (PRISMA-P) 2015 statement. Syst Rev. 2015;4(1):1.

|                |                     |                                                           | Page          |
|----------------|---------------------|-----------------------------------------------------------|---------------|
| Reporting Item |                     |                                                           | Number        |
| <b>Title</b>   |                     |                                                           |               |
| Identification | <a href="#">#1a</a> | Identify the report as a protocol of a systematic review  | Title<br>page |
| Update         | <a href="#">#1b</a> | If the protocol is for an update of a previous systematic | N/A           |

review, identify as such

## Registration

[#2](#) If registered, provide the name of the registry (such as PROSPERO) and registration number N/A

## Authors

[#3a](#) Provide name, institutional affiliation, e-mail address of all protocol authors; provide physical mailing address of corresponding author Title page

[#3b](#) Describe contributions of protocol authors and identify the guarantor of the review 13

## Amendments

[#4](#) If the protocol represents an amendment of a previously completed or published protocol, identify as such and list changes; otherwise, state plan for documenting important protocol amendments N/A

## Support

[#5a](#) Indicate sources of financial or other support for the review 13

[#5b](#) Provide name for the review funder and / or sponsor 13

[#5c](#) Describe roles of funder(s), sponsor(s), and / or institution(s), if any, in developing the protocol 13

## Introduction

|    |                      |                      |                                                                  |    |
|----|----------------------|----------------------|------------------------------------------------------------------|----|
| 1  | Rationale            | <a href="#">#6</a>   | Describe the rationale for the review in the context of what is  | 5  |
| 2  |                      |                      | already known                                                    |    |
| 3  |                      |                      |                                                                  |    |
| 4  |                      |                      |                                                                  |    |
| 5  |                      |                      |                                                                  |    |
| 6  | Objectives           | <a href="#">#7</a>   | Provide an explicit statement of the question(s) the review will | 8  |
| 7  |                      |                      | address with reference to participants, interventions,           |    |
| 8  |                      |                      | comparators, and outcomes (PICO)                                 |    |
| 9  |                      |                      |                                                                  |    |
| 10 |                      |                      |                                                                  |    |
| 11 |                      |                      |                                                                  |    |
| 12 |                      |                      |                                                                  |    |
| 13 |                      |                      |                                                                  |    |
| 14 | <b>Methods</b>       |                      |                                                                  |    |
| 15 |                      |                      |                                                                  |    |
| 16 |                      |                      |                                                                  |    |
| 17 | Eligibility criteria | <a href="#">#8</a>   | Specify the study characteristics (such as PICO, study design,   | 9  |
| 18 |                      |                      | setting, time frame) and report characteristics (such as years   |    |
| 19 |                      |                      | considered, language, publication status) to be used as          |    |
| 20 |                      |                      | criteria for eligibility for the review                          |    |
| 21 |                      |                      |                                                                  |    |
| 22 |                      |                      |                                                                  |    |
| 23 |                      |                      |                                                                  |    |
| 24 |                      |                      |                                                                  |    |
| 25 |                      |                      |                                                                  |    |
| 26 |                      |                      |                                                                  |    |
| 27 | Information          | <a href="#">#9</a>   | Describe all intended information sources (such as electronic    | 9  |
| 28 |                      |                      | databases, contact with study authors, trial registers or other  |    |
| 29 | sources              |                      | grey literature sources) with planned dates of coverage          |    |
| 30 |                      |                      |                                                                  |    |
| 31 |                      |                      |                                                                  |    |
| 32 |                      |                      |                                                                  |    |
| 33 |                      |                      |                                                                  |    |
| 34 |                      |                      |                                                                  |    |
| 35 | Search strategy      | <a href="#">#10</a>  | Present draft of search strategy to be used for at least one     | 9  |
| 36 |                      |                      | electronic database, including planned limits, such that it      |    |
| 37 |                      |                      | could be repeated                                                |    |
| 38 |                      |                      |                                                                  |    |
| 39 |                      |                      |                                                                  |    |
| 40 |                      |                      |                                                                  |    |
| 41 |                      |                      |                                                                  |    |
| 42 | Study records -      | <a href="#">#11a</a> | Describe the mechanism(s) that will be used to manage            | 10 |
| 43 | data management      |                      | records and data throughout the review                           |    |
| 44 |                      |                      |                                                                  |    |
| 45 |                      |                      |                                                                  |    |
| 46 |                      |                      |                                                                  |    |
| 47 |                      |                      |                                                                  |    |
| 48 | Study records -      | <a href="#">#11b</a> | State the process that will be used for selecting studies (such  | 10 |
| 49 | selection process    |                      | as two independent reviewers) through each phase of the          |    |
| 50 |                      |                      | review (that is, screening, eligibility and inclusion in meta-   |    |
| 51 |                      |                      | analysis)                                                        |    |
| 52 |                      |                      |                                                                  |    |
| 53 |                      |                      |                                                                  |    |
| 54 |                      |                      |                                                                  |    |
| 55 |                      |                      |                                                                  |    |
| 56 |                      |                      |                                                                  |    |
| 57 |                      |                      |                                                                  |    |
| 58 | Study records -      | <a href="#">#11c</a> | Describe planned method of extracting data from reports          | 11 |
| 59 |                      |                      |                                                                  |    |
| 60 |                      |                      |                                                                  |    |

|    |                    |                                                                                      |    |
|----|--------------------|--------------------------------------------------------------------------------------|----|
| 1  | data collection    | (such as piloting forms, done independently, in duplicate), any                      |    |
| 2  |                    |                                                                                      |    |
| 3  | process            | processes for obtaining and confirming data from investigators                       |    |
| 4  |                    |                                                                                      |    |
| 5  |                    |                                                                                      |    |
| 6  | Data items         | <a href="#">#12</a> List and define all variables for which data will be sought      | 11 |
| 7  |                    |                                                                                      |    |
| 8  |                    | (such as PICO items, funding sources), any pre-planned data                          |    |
| 9  |                    |                                                                                      |    |
| 10 |                    | assumptions and simplifications                                                      |    |
| 11 |                    |                                                                                      |    |
| 12 |                    |                                                                                      |    |
| 13 | Outcomes and       | <a href="#">#13</a> List and define all outcomes for which data will be sought,      | 11 |
| 14 |                    |                                                                                      |    |
| 15 | prioritization     | including prioritization of main and additional outcomes, with                       |    |
| 16 |                    | rationale                                                                            |    |
| 17 |                    |                                                                                      |    |
| 18 |                    |                                                                                      |    |
| 19 |                    |                                                                                      |    |
| 20 |                    |                                                                                      |    |
| 21 | Risk of bias in    | <a href="#">#14</a> Describe anticipated methods for assessing risk of bias of       | 10 |
| 22 |                    |                                                                                      |    |
| 23 | individual studies | individual studies, including whether this will be done at the                       |    |
| 24 |                    |                                                                                      |    |
| 25 |                    | outcome or study level, or both; state how this information will                     |    |
| 26 |                    |                                                                                      |    |
| 27 |                    | be used in data synthesis                                                            |    |
| 28 |                    |                                                                                      |    |
| 29 |                    |                                                                                      |    |
| 30 |                    |                                                                                      |    |
| 31 | Data synthesis     | <a href="#">#15a</a> Describe criteria under which study data will be quantitatively | 11 |
| 32 |                    |                                                                                      |    |
| 33 |                    | synthesised                                                                          |    |
| 34 |                    |                                                                                      |    |
| 35 |                    |                                                                                      |    |
| 36 | Data synthesis     | <a href="#">#15b</a> If data are appropriate for quantitative synthesis, describe    | 11 |
| 37 |                    |                                                                                      |    |
| 38 |                    | planned summary measures, methods of handling data and                               |    |
| 39 |                    |                                                                                      |    |
| 40 |                    | methods of combining data from studies, including any                                |    |
| 41 |                    |                                                                                      |    |
| 42 |                    | planned exploration of consistency (such as I <sup>2</sup> , Kendall's $\tau$ )      |    |
| 43 |                    |                                                                                      |    |
| 44 |                    |                                                                                      |    |
| 45 |                    |                                                                                      |    |
| 46 | Data synthesis     | <a href="#">#15c</a> Describe any proposed additional analyses (such as              | 11 |
| 47 |                    |                                                                                      |    |
| 48 |                    | sensitivity or subgroup analyses, meta-regression)                                   |    |
| 49 |                    |                                                                                      |    |
| 50 |                    |                                                                                      |    |
| 51 | Data synthesis     | <a href="#">#15d</a> If quantitative synthesis is not appropriate, describe the type | 11 |
| 52 |                    |                                                                                      |    |
| 53 |                    | of summary planned                                                                   |    |
| 54 |                    |                                                                                      |    |
| 55 |                    |                                                                                      |    |
| 56 |                    |                                                                                      |    |
| 57 | Meta-bias(es)      | <a href="#">#16</a> Specify any planned assessment of meta-bias(es) (such as         | 11 |
| 58 |                    |                                                                                      |    |
| 59 |                    |                                                                                      |    |
| 60 |                    |                                                                                      |    |



1 publication bias across studies, selective reporting within  
2  
3 studies)  
4

5  
6 Confidence in [#17](#) Describe how the strength of the body of evidence will be 11  
7  
8 cumulative assessed (such as GRADE)  
9  
10 evidence  
11  
12

13 None The PRISMA-P checklist is distributed under the terms of the Creative Commons Attribution  
14 License CC-BY 4.0. This checklist can be completed online using <https://www.goodreports.org/>, a tool  
15  
16 made by the [EQUATOR Network](#) in collaboration with [Penelope.ai](#)  
17  
18  
19  
20  
21  
22  
23  
24  
25  
26  
27  
28  
29  
30  
31  
32  
33  
34  
35  
36  
37  
38  
39  
40  
41  
42  
43  
44  
45  
46  
47  
48  
49  
50  
51  
52  
53  
54  
55  
56  
57  
58  
59  
60
