# Supplementary material for: Translating caring competencies to remote working environments: a systematic review protocol
Source: PubMed Central journal article supplement — BMJ Open. 2021 May 19;11(5):e048459. doi: 10.1136/bmjopen-2020-048459 (PMC8137205; doi:10.1136/bmjopen-2020-048459), 2021-05-19
Supplement: bmjopen-2020-048459supp001.pdf [file bmjopen-2020-048459supp001.pdf]

## Supplementary File

Database: Ovid MEDLINE(R) and Epub Ahead of Print, In-Process & Other Non-Indexed Citations and Daily <1946 to December 15, 2020>

Search Strategy:

- 
- 1 exp education, medical, graduate/ or education, medical, undergraduate/ or education, nursing/ or education, nursing, baccalaureate/ or education, nursing, diploma programs/ or education, nursing, graduate/ or teacher training/ (152632)
  - 2 ((clinician\* or doctor\* or health profession\* or medical student\* or nurs\* or physician\* or psycholog\* or psychiatr\* or social work\* or teacher\*) adj3 (educat\* or professional development or train\*)).tw,kf. (101954)
  - 3 1 or 2 (226009)
  - 4 Telemedicine/ or Educational Technology/ or informatics.tw,kf. (41786)
  - 5 telemedicine/ or remote consultation/ (29366)
  - 6 exp Therapy, Computer-Assisted/ (66286)
  - 7 ((care or consultation\* or educat\* or healthcare or learning) adj3 (computer\* or digital or electronic or online)).tw,kf. (15071)
  - 8 (digital therapeutic\* or digital technolog\* or ehealth or e-health or e-support\* mobile health or mhealth or m-health or remote consult\* or teleconsult\* or tele-consult\* or telehealth or tele-health\* or telemedic\* or tele-medic\* or telepsychiatr\* or tele-psychiatr\* or teletherap\* or tele-therap\*).tw,kf. (35571)
  - 9 (online instruction or online learning or online teaching or digital econom\*).tw,kf. (2166)
  - 10 ((education\* or information\*) adj3 technolog\*).tw,kf. (22885)
  - 11 4 or 5 or 6 or 7 or 8 or 9 or 10 (161050)
  - 12 3 and 11 (6078)
  - 13 limit 12 to english language (5780)
  - 14 limit 13 to yr="2010 -Current" (3702)
